# 1 Binding affinity landscapes constrain the evolution of broadly 2 neutralizing anti-influenza antibodies 3

4 Angela M. Phillips<sup>1\*</sup>, Katherine R. Lawrence<sup>1,2,3,4\*</sup>, Alief Moulana<sup>1</sup>, Thomas Dupic<sup>1</sup>, Jeffrey  
5 Chang<sup>5</sup>, Milo S. Johnson<sup>1</sup>, Ivana Cvijović<sup>6</sup>, Thierry Mora<sup>7</sup>, Aleksandra M. Walczak<sup>7</sup>, Michael  
6 M. Desai<sup>1,2,3,5§</sup>  
7

8 <sup>1</sup>Department of Organismic and Evolutionary Biology, Harvard University, Cambridge MA 02138,

9 <sup>2</sup>NSF-Simons Center for Mathematical and Statistical Analysis of Biology, Harvard University,  
10 Cambridge MA 02138, <sup>3</sup>Quantitative Biology Initiative, Harvard University, Cambridge MA 02138,

11 <sup>4</sup>Department of Physics, Massachusetts Institute of Technology, Cambridge MA 02139,

12 <sup>5</sup>Department of Physics, Harvard University, Cambridge, MA 02138, <sup>6</sup>Department of Applied  
13 Physics, Stanford University, Stanford CA 94305, <sup>7</sup>Laboratoire de physique de l'École normale  
14 supérieure, CNRS, PSL University, Sorbonne Université, and Université de Paris, 75005 Paris,  
15 France.  
16

17 \*These authors contributed equally to this work.

18 §[mdesai@oeb.harvard.edu](mailto:mdesai@oeb.harvard.edu)  
19

20 **Over the past two decades, several broadly neutralizing antibodies (bnAbs) that confer  
21 protection against diverse influenza strains have been isolated<sup>1,2</sup>. Structural and  
22 biochemical characterization of these bnAbs has provided molecular insight into how they  
23 bind distinct antigens<sup>1</sup>. However, our understanding of the evolutionary pathways leading  
24 to bnAbs, and thus how best to elicit them, remains limited. Here, we measure equilibrium  
25 dissociation constants of combinatorially complete mutational libraries for two naturally  
26 isolated influenza bnAbs<sup>3-5</sup> (CR-9114, 16 mutations; CR-6261, 11 mutations),  
27 reconstructing all possible intermediates back to the unmutated germline sequences. We  
28 find that these two libraries exhibit strikingly different patterns of breadth: while many  
29 variants of CR-6261 display moderate affinity to diverse antigens, those of CR-9114 display  
30 appreciable affinity only in specific, nested combinations. By examining the extensive  
31 pairwise and higher-order epistasis between mutations, we find key sites with strong  
32 synergistic interactions that are highly similar across antigens for CR-6261 and different  
33 for CR-9114. Together, these features of the binding affinity landscapes strongly favor  
34 sequential acquisition of affinity to diverse antigens for CR-9114, while the acquisition of  
35 breadth to more similar antigens for CR-6261 is less constrained. These results, if  
36 generalizable to other bnAbs, may explain the molecular basis for the widespread  
37 observation that sequential exposure favors greater breadth<sup>6-8</sup>, and such mechanistic  
38 insight will be essential for predicting and eliciting broadly protective immune responses.  
39**

40 Vaccination harnesses the adaptive immune system, which responds to new pathogens by  
41 mutating antibody-encoding genes and selecting for variants that bind the pathogen of interest.  
42 However, influenza remains a challenging target for immunization: most antibodies elicited by  
43 vaccines provide protection against only a subset of strains, largely due to the rapid evolution of  
44 the influenza surface protein hemagglutinin (HA)<sup>9,10</sup>. After nearly two decades of studies, only a  
45 handful of broadly neutralizing antibodies (bnAbs) have been isolated from humans, with varying  
46 degrees of cross-protection against diverse strains<sup>1,3,4,11</sup>. Still, we do not fully understand many  
47 factors affecting how and when bnAbs are produced. In particular, affinity is acquired through a  
48 complex process of mutation and selection<sup>12</sup>, but the effects of mutations on binding affinity to  
49 diverse antigens are not well characterized.

51 For example, consider two well-studied influenza bnAbs that display varying levels of breadth:  
52 CR-9114 is one of the broadest anti-influenza antibodies ever found, neutralizing strains from  
53 both groups of influenza A and strains from influenza B, while CR-6261 is limited to neutralizing  
54 strains from Group 1 of influenza A<sup>3-5,13</sup>. Both antibodies were isolated from vaccinated donors,  
55 derive from very similar germline sequences (IGHV1–69 and IGHJ6), and bind the conserved HA  
56 stem epitope (ED Fig. 1)<sup>3-5</sup>. Each antibody heavy chain has many mutations (18 amino acid  
57 changes for CR-9114, 14 for CR-6261, Fig. 1a), including seven positions that are mutated in  
58 both, yet the contributions of these mutations to affinity against different antigens remain unclear<sup>4</sup>.

59  
60 Beyond single mutational effects, it remains unknown whether there are correlated effects or  
61 strong trade-offs between binding to different antigens (pleiotropy), or non-additive interactions  
62 between mutations (epistasis). Such epistatic and pleiotropic effects can constrain the mutational  
63 pathways accessible under selection, as has been observed for other proteins<sup>14-22</sup>. Epistasis in  
64 antibody-antigen interactions remains significantly understudied<sup>23-25</sup>, and most deep mutational  
65 scanning studies have focused on antigens<sup>26-28</sup>. In contrast to typical protein evolution, antibody  
66 affinity maturation proceeds by discrete rounds of mutation and selection<sup>12</sup>, typically with more  
67 than one nucleotide mutation occurring between selective rounds<sup>29</sup>. In addition, antibodies are  
68 inherently mutationally tolerant<sup>25,30,31</sup>, and bnAbs tend to have many more mutations than specific  
69 antibodies<sup>2,32</sup>, generating opportunities for interactions that scale combinatorially. Thus, if epistatic  
70 and pleiotropic constraints exist for antibodies, they could affect the likelihood of producing bnAbs  
71 under different antigen selection regimes<sup>24</sup> and may account for the low frequencies of bnAbs in  
72 natural repertoires<sup>1</sup>. Characterizing the prevalence of these constraints on bnAb evolution will  
73 provide valuable insight for designing optimal vaccination strategies<sup>33,34</sup>.

74  
75 To date, studies of antibody binding have been limited to small numbers of individual sequences,  
76 deep mutational scans of single mutations, and mutagenesis of small regions<sup>24,25,31,35-40</sup>, due in  
77 part to practical constraints on library scale and the throughput of affinity assays. This has limited  
78 our ability to comprehensively characterize binding landscapes for naturally isolated bnAbs, which  
79 often involve many mutations spanning framework (FW) and complementarity-determining  
80 regions (CDR)<sup>1,2,32</sup>. Here, we overcome these challenges by generating combinatorially complete  
81 libraries of up to  $\sim 10^5$  antibody sequences and assaying their binding affinities in a high-  
82 throughput yeast-display system<sup>35</sup>. Specifically, we made all combinations of 16 mutations from  
83 CR-9114 (65,536 variants) and all combinations of 11 mutations from CR-6261 (2,048 variants).  
84 These libraries include all heavy-chain mutations in these antibodies, except select mutations  
85 distant from the paratope (Fig. 1a, and see SI). Both antibodies engage antigens solely through  
86 their heavy-chain regions<sup>4,5</sup>, and thus are well-suited for yeast display as single-chain variable  
87 fragments (see SI)<sup>41</sup>.

88  
89 We use the Tite-Seq method<sup>35</sup>, which integrates flow cytometry and sequencing (ED Fig. 2b), to  
90 assay equilibrium binding affinities of each sequence in these libraries against select antigens  
91 that span the breadth of binding for each antibody (Fig 1b). For CR-6261, we chose two divergent  
92 group 1 HA subtypes (H1 and H9), while for CR-9114, we chose the three highly divergent  
93 subtypes present in the vaccine (H1 from group 1, H3 from group 2, and influenza B)<sup>3</sup>. Inferred  
94 affinities outside our titration boundaries ( $10^{-11}$  –  $10^{-6}$  M for H3 and influenza B,  $10^{-12}$  –  $10^{-7}$  M for  
95 H1 and H9) are pinned to the boundary, as deviations beyond these boundaries are likely not  
96 physiologically relevant<sup>42</sup>. Antibody expression is not strongly impacted by sequence identity,  
97 although some mutations have modest effects that may be inversely correlated with their effect  
98 on affinity (ED Fig. 3). Affinities obtained by Tite-Seq are reproducible across biological triplicates  
99 (ED Fig. 2c,e; average standard error of 0.047  $-\log K_D$  units across antibody-antigen pairs) and  
100 are highly accurate as verified for select variants by isogenic flow cytometry (ED Fig. 2d,f) and by  
101 solution-based affinity measurements made by others<sup>3,4,13,24</sup>.

102 We begin by examining the distribution of binding affinities across antigens for each antibody  
103 library (Fig. 1). We observe that most CR-9114 variants have measurable affinity to H1 (97%),  
104 fewer to H3 (11%), and still fewer to influenza B (0.3%) (Fig. 1c,d). For H1, only a few mutations  
105 are needed to improve from the germline affinity. In contrast, variants are not able to bind H3  
106 unless they have several more mutations, and many more for influenza B. This hierarchical  
107 structure is in striking contrast to the CR-6261 library, in which most variants can bind both  
108 antigens (92% for H1, 81% for H9), variants have a similar  $K_D$  distribution, and many variants  
109 display intermediate affinity to both antigens (Fig. 1e,f). To visualize how genotypes give rise to  
110 the hierarchical structure of CR-9114 binding affinities, we represent the binding affinities for H1  
111 as a force-directed graph. Here, each variant is a node connected to its 16 single-mutation  
112 neighbors, with edge weights inversely proportional to the change in H1 binding affinity, such that  
113 variants with similar genotype and  $K_D$  tend to form clusters (Fig. 1g, ED Fig. 4). Coloring this  
114 genotype-to-phenotype map by the  $-\log K_D$  to each of the three antigens, we see that sequences  
115 that bind H3 and influenza B are highly localized and overlapping, meaning that they share  
116 specific mutations. Thus, while many CR-9114 variants strongly bind H1, only a specific subset  
117 bind multiple antigens.

118  
119 To dissect how mutations drive the structure of these binding landscapes, we next infer specific  
120 mutational effects. We first log-transform binding affinities to produce free energy changes, which  
121 should combine additively under the natural null expectation<sup>43,44</sup>. We then define a linear model  
122 with single mutational effects and interaction terms up to a specified order (defined relative to the  
123 unmutated germline sequence, see SI for alternatives), and fit coefficients by ordinary least  
124 squares regression (see SI for models with nonlinear transformations). We use cross-validation  
125 to identify the maximal order of interaction for each antigen and report coefficients at each order  
126 from these best-fitting models (CR-9114: 5<sup>th</sup> order for H1, 4<sup>th</sup> for H3, 1<sup>st</sup> for influenza B; CR-6261:  
127 4<sup>th</sup> order for H1 and H9; see SI). We note that the maximum order of interactions is affected by  
128 our inference power, particularly by the number of sequences with appreciable binding, and so  
129 we interpret these models as showing strong evidence of epistasis at least up to the order  
130 indicated. We also explored inferring epistasis up to full order using Walsh-Hadamard  
131 transformations; results are qualitatively similar but less conservative than cross-validated  
132 regression (see SI).

133  
134 Examining the effect of individual mutations on the germline background (Fig. 2a,b), we observe  
135 several mutations that enhance binding to all antigens (e.g. S83F for CR-9114), and mutations  
136 that confer trade-offs for binding distinct antigens (e.g. F30S in CR-9114 reduces affinity for H1  
137 but enhances affinity for influenza B). Generally, large-effect mutations are at sites that contact  
138 HA<sup>4,5</sup> (Fig. 2c, ED Fig. 5). Consistent with prior biochemical and structural work, mutations  
139 essential for CR-9114 breadth are spread throughout FW3 and the CDRs, forming hydrophobic  
140 contacts and hydrogen bonds with residues in the conserved HA stem epitope<sup>4</sup>. We observe three  
141 specific mutations that are required for binding to H3 (present at over 90% frequency in the set of  
142 binding sequences), and eight specific mutations that are required for binding to influenza B. Many  
143 of these breadth-conferring mutations are absent in CR-6261, particularly those in CDR2<sup>4,5</sup>.  
144 Notably, these sets of required mutations in CR-9114 exhibit a nested structure: mutations  
145 beneficial for H1 are required for H3, and mutations required for H3 are required for influenza B,  
146 giving rise to the hierarchical structure of the binding landscape (Fig. 1c).

147  
148 Beyond these exceptionally synergistic interactions between required mutations, we find that  
149 epistasis is widespread, accounting for 18–33 percent of explained variance depending on the  
150 antibody-antigen pair (except influenza B, see SI). Pairwise interactions are dominated by a few  
151 mutations (e.g. F30S for CR-9114 and S35R for CR-6261) that exhibit many interactions, both

152 positive and negative, with other mutations (Fig. 2d,e). Overall, mutations with strong pairwise  
153 interactions tend to be close in the crystal structure (Fig. 2f, ED Fig. 5)<sup>4,5</sup>.

154  
155 Our dataset also allows us to resolve higher-order epistasis. In addition to the required mutations,  
156 our models identify numerous strong third to fifth order interactions, with a subset of mutations  
157 participating in many mutual interactions at all orders. For CR-9114 binding to H1, this subset  
158 consists of five mutations, distributed across three different regions of the heavy chain (Fig. 3a,b).  
159 Some of these mutations likely generate (K82I, S83F) or abrogate (F30S) contacts to HA, and  
160 others (I57S, A65T) may indirectly impact HA binding by reorienting contact residues in CDR2<sup>4</sup>.  
161 Within this set of five residues, we first illustrate two examples of third-order epistasis by grouping  
162 all sequences by their genotypes only at these five sites (Fig. 3c). Intriguingly, some mutations  
163 that are deleterious in the germline background ('-' annotations) are beneficial in doubly-mutated  
164 backgrounds ('+' annotations). For example, mutation F30S is significantly less deleterious in  
165 backgrounds with S83F than in the germline background, suggesting that new hydrophobic  
166 contacts in FW3 may be able to compensate for the potential loss of contacts in CDR1. Yet F30S  
167 unexpectedly becomes beneficial after an additional mutation I57S in CDR2, indicating more  
168 complex interactions between flexible CDR and FW loop regions (Fig. 3b,c)<sup>4</sup>.

169  
170 To see how these high-order interactions drive the overall structure of the binding affinity  
171 landscape, we return to the force-directed graph, now colored by genotype at these five key sites  
172 (Fig. 3d; only points corresponding to genotypes shown in Fig. 3c are colored). We see that these  
173 five sites largely determine the overall structure of the map: points of the same color tend to cluster  
174 together, despite varying in their genotypes at the other 11 sites. However, we observe that  
175 interactions with other mutations do exist, as evidenced by separate clusters with the same color  
176 (e.g. the two clusters in teal for 57,65 are distinguished by a positive third-order interaction with  
177 site 64, Fig. 3e). These patterns are not confined to the genotypes shown in Fig. 3c; if we color  
178 all 32 possible genotypes at the five key sites, we observe the same general patterns (ED Fig. 6;  
179 an interactive data browser for exploring these patterns of epistasis is available [here](#)). Interactions  
180 between these five sites are also enriched for significant epistatic coefficients ( $p < 10^{-3}$ ; 26 of 31  
181 possible terms are significant, compared to an average of 4 terms among all sets of five sites, ED  
182 Fig. 6), including the 5<sup>th</sup> order interaction between all five residues (Fig. 3f). Remarkably, these  
183 five mutations underlie significant high-order epistasis for other antigens as well: all five are either  
184 required for binding or participate extensively in interactions for H3 and influenza B (ED Fig. 6f).

185  
186 Higher-order epistasis in CR-6261 is similarly dominated by a subset of mutations in CDR1 and  
187 FW3, at identical or neighboring positions as some key sites for CR-9114 (Fig. 3g). These  
188 mutations exhibit strong diminishing returns epistasis at third and fourth order, counteracting their  
189 synergistic pairwise effects, in a similar manner across both antigens (Fig. 3h, ED Fig. 7). Many  
190 fourth-order combinations of these mutations display interaction coefficients of similar magnitude  
191 (ED Fig. 7b), though they may be signatures of even higher-order interactions that we are  
192 underpowered to infer.

193  
194 A common approach to quantify how epistasis constrains mutational trajectories is to count the  
195 number of "uphill" paths (i.e. where affinity improves at every mutational step from the germline  
196 to the somatic sequence). We find that only a small fraction of potential paths are uphill (0.00005%  
197 +/- 0.00004% for CR-9114 binding H1, and 0.2% +/- 0.04% for CR-6261 binding H1, as estimated  
198 by bootstrap, see SI). However, we note that for all antibody-antigen combinations, the somatic  
199 sequence is not the global maximum of the landscape (the best-binding sequence) and some  
200 mutations have deleterious effects on average. Hence, strictly uphill paths are only possible due  
201 to sign epistasis, where normally deleterious mutations have beneficial effects in specific genetic  
202 backgrounds.

203 Overall, we see that mutational effects and interactions between them explain the affinity  
204 landscapes we observe. For CR-9114, binding affinity to H1 can be achieved through different  
205 sets of few mutations with complex interactions. In contrast, a specific set of many mutations with  
206 strong synergistic interactions is required to bind H3, and to an even greater extent, influenza B,  
207 giving rise to the landscape's hierarchical structure (Fig. 1c). For CR-6261, the higher-order  
208 interactions are more similar between H1 and H9, which is consistent with the more correlated  
209 patterns of binding affinities between these two antigens (Fig. 1e).

210  
211 The hierarchical nature of the CR-9114 landscape suggests that this lineage developed affinity to  
212 each antigen sequentially. Considering the maximum  $-\log K_D$  achieved by sequences with a given  
213 number of mutations (a proxy for time), we see that improvements in H1 binding can be realized  
214 early on, whereas improvements in H3 binding are not possible until later, and even later for  
215 influenza B (Fig. 4a). In fact, the nested structure of affinity-enhancing mutations forces  
216 improvements in binding affinity to occur sequentially. If selection pressures were also  
217 experienced in this sequence, mutations that improve binding to the current antigen would lead  
218 to the genotypes required to begin improving binding to the next. Indeed, we find that for CR-  
219 9114, there are more uphill paths leading to the somatic sequence if selection acts first on binding  
220 to H1 and later to H3 and influenza B (Fig. 4c). In contrast, for CR-6261, improvements in binding  
221 can occur early on for both antigens (Fig. 4b) and the number of uphill paths is more similar across  
222 single-antigen and sequential selection pressures (Fig. 4d).

223  
224 To compare antigen selection scenarios more generally, we developed a framework that  
225 evaluates the total probability of all possible mutational pathways from germline to somatic, under  
226 an array of antigen selection scenarios (individual, sequential, and mixed). Our framework  
227 assumes that the probability of any mutational step is higher if  $-\log K_D$  increases, but does not  
228 necessarily forbid neutral or deleterious steps; we evaluate a variety of specific forms of this step  
229 probability and find that our major results are consistent (ED Fig. 8a, see SI). Mixed antigen  
230 regimes approximate exposure to a cocktail of antigens. We model these with two approaches:  
231 (1) "average", using the average  $-\log K_D$  across all antigens, and (2) "random," using  $-\log K_D$  for a  
232 randomly selected antigen at each step (note that using the maximum  $-\log K_D$  across antigens  
233 would always be trivially favored)<sup>6</sup>. While these models simplify the complexities of affinity  
234 maturation *in vivo*<sup>12</sup>, especially in how affinity relates to B cell lineage dynamics, they provide  
235 insight into the relative probabilities of mutational paths under distinct antigen selection scenarios.

236  
237 Again we find that the vast majority of likely antigen selection scenarios for CR-9114 involve first  
238 H1, followed by H3, followed by influenza B (Fig. 4e, ED Fig. 8b). These results are underscored  
239 by examining improvement in  $-\log K_D$  along the most likely mutational paths for each scenario  
240 (Fig. 4g): in the optimal sequential scenario,  $-\log K_D$  can improve substantially for each antigen in  
241 turn, while in an H1-only scenario, the improvements in H1 binding at each step are much more  
242 gradual, reducing the likelihood. The average mixed scenario shows qualitatively similar paths to  
243 the optimal sequential scenario, although with lower overall probability. In the random mixed  
244 scenario, even the best pathways are often unable to improve affinity to the randomly selected  
245 antigen, and affinity to antigens not under selection often declines, making these scenarios much  
246 less likely.

247  
248 Given the optimal sequential selection scenario, the vast majority of genotypes are unlikely  
249 evolutionary intermediates to the somatic sequence (ED Fig. 8d). We visualize the impact of  
250 epistasis on mutational order by considering the probability of each mutation to occur at each  
251 mutational step (Fig. 4i; ED Fig. 8e,f). The three antigen exposure epochs exhibit clear differences  
252 in favored mutations. Mutations I57S, K82I, and S83F must occur early, due to their strong  
253 synergistic interactions for all three antigens. In addition, we see that F30S is unlikely to happen

254 very early (due to its sign epistasis under H1 selection) as well as unlikely to happen very late  
255 (due to its strong benefit under influenza B selection).

256  
257 In contrast, for CR-6261, all selection scenarios have relatively similar likelihood (Fig. 4f, ED Fig.  
258 8c). Among sequential scenarios, however, those beginning with H1 are more likely than those  
259 beginning with H9, as the first two mutational steps can improve affinity to H1 more than H9, and  
260 mutations late in maturation can improve affinity to H9 more than H1 (Figs. 1f, 4b). Still, unlike  
261 CR-9114, in both single antigen and mixed scenarios, there are many likely paths that continually  
262 improve in binding to both antigens (Fig. 4h). Initially the order of mutations is highly constrained  
263 due to strong synergistic epistasis, and differences between selection scenarios reflect  
264 differences in mutational effects between antigens (Fig. 4h, ED Fig. 8g,h).

265  
266 Overall, we find that evolutionary pathways to bnAbs can be highly contingent on epistatic and  
267 pleiotropic effects of mutations. Specifically, the acquisition of breadth for CR-9114 is extremely  
268 constrained and is likely to have occurred through exposure to diverse antigens in a specific order,  
269 due to the structure of correlations and interactions between mutational effects. In contrast, CR-  
270 6261 could have acquired affinity to H1 and H9 in a continuous and simultaneous manner,  
271 perhaps because these antigens are more similar; since H9 is not a commonly circulating strain,  
272 this breadth may well have been acquired by chance<sup>24</sup>. Though we cannot conclusively determine  
273 which antigens were involved in the selection of these antibodies *in vivo*, the diverse HA subtypes  
274 discussed here capture variation representative of circulating influenza strains and thus serve as  
275 useful probes of varying levels of breadth<sup>1</sup>. Further, we note that the likelihood of pathways is  
276 conditioned on ending at the exact somatic sequence. Indeed, we observe that not all of the  
277 observed mutations are required to confer broad affinity, and future work is needed to explore  
278 what alternative pathways to breadth might be accessible through other mutations.

279  
280 The landscapes characterized here are among the largest combinatorially complete collections  
281 of mutations published to date. In some respects, our observations of high-order interactions are  
282 consistent with earlier work in other proteins. In particular, epistasis has been found to affect  
283 function and constrain evolutionarily accessible pathways across functionally and structurally  
284 distinct proteins<sup>14-22</sup>. Further, pairwise and high-order epistasis appear to be common features of  
285 binding interfaces, such as enzyme-substrate and receptor-ligand interactions<sup>14-17,19,20</sup>, and  
286 interacting mutations are often spaced in both sequence and structure, underscoring the  
287 complexity of protein-protein interfaces<sup>17,23,25,45,46</sup>. On the other hand, the strongly synergistic,  
288 nested mutations crucial for CR-9114 breadth are unusual, perhaps due to the nature of antibody-  
289 antigen interfaces or to the unique dynamics of affinity maturation<sup>12</sup>. Together, these observations  
290 suggest that interactions between multiple mutations, such as those we characterize here, could  
291 play a substantial role in affinity maturation and may contribute to the rarity of bnAbs in natural  
292 repertoires.

293  
294 Our findings provide molecular insight into the emerging picture of how selection can elicit broad  
295 affinity, illustrated by a substantial recent body of work ranging from *in vivo* experimental  
296 approaches<sup>7,8</sup> to quantitative modeling of immune system dynamics<sup>6,47-50</sup>. These diverse studies  
297 often find that mixed-antigen regimens are less effective than sequential regimens at eliciting  
298 bnAbs. Our results demonstrate that, at least in part, this may be due to the intrinsic structure of  
299 the mutational landscape, defined by the complex interactions of mutational effects across  
300 antigens. With more studies of binding landscapes for diverse antibodies, we could better  
301 understand how such features generalize between different germline sequences, somatic  
302 mutation profiles, and antigen molecules. These insights will be essential for leveraging germline  
303 sequence data and antigen exposure information to predict, design, and elicit bnAbs for  
304 therapeutic and immunization applications.

305 **ACKNOWLEDGEMENTS**

306 We thank Rhys Adams for helpful discussion of the Tite-Seq experiments, Zach Niziolek for  
307 assistance with flow cytometry, Kevin McCarthy for help with antigen production, Matt Melissa for  
308 help acquiring strains and protocols, and Tyler Starr and members of the Denic, Gaudet, and  
309 Wittrup labs for help with experimental protocols. We also thank Jesse Bloom, Andrew Murray,  
310 and Michael Laub for helpful discussion and members of the Desai lab for comments on the  
311 manuscript. A.M.P. acknowledges support from the Howard Hughes Medical Institute Hanna H.  
312 Gray Postdoctoral Fellowship Program. K.R.L. acknowledges support from the Fannie & John  
313 Hertz Foundation Graduate Fellowship Award and the NSF Graduate Research Fellowship  
314 Program. T.D. acknowledges support from the Human Sciences Frontier Program. J.C.  
315 acknowledges support from the NSF Graduate Research Fellowship Program. M.S.J.  
316 acknowledges support from the NSF Graduate Research Fellowship Program. Work in Paris was  
317 funded by the European Research Council COG 724208. M.M.D. acknowledges support from  
318 grant PHY-1914916 from the NSF and grant GM104239 from the NIH. The computations in this  
319 paper were run on the FASRC Cannon cluster supported by the FAS Division of Science  
320 Research Computing Group at Harvard University.

321

322 **AUTHOR CONTRIBUTIONS**

323 A.M.P., K.R.L., I.C., M.M.D, A.W., and T.M. conceived the project; A.M.P., K.R.L., and A.M.  
324 generated the yeast display libraries; A.M.P., K.R.L., A.M., J.C., and I.C. conducted experiments  
325 and binding affinity measurements; A.M.P., K.R.L., A.M., and T.D. developed inference methods  
326 and conducted statistical analysis; M.S.J. developed the interactive data browser; A.M.P.,  
327 K.R.L., M.M.D., A.W., and T.M. wrote the paper.

328

329 Raw and processed data are available in an interactive data browser here:

330 [https://yodabrowser.netlify.app/yoda\\_browser/](https://yodabrowser.netlify.app/yoda_browser/)

331 **REFERENCES CITED**

332

- 333 1 Corti, D. *et al.* Tackling influenza with broadly neutralizing antibodies. *Curr Opin Virol* **24**,  
334 60-69 (2017).
- 335 2 Corti, D. & Lanzavecchia, A. Broadly neutralizing antiviral antibodies. *Annu Rev Immunol*  
336 **31**, 705-742 (2013).
- 337 3 Throsby, M. *et al.* Heterosubtypic Neutralizing Monoclonal Antibodies Cross-Protective  
338 against H5N1 and H1N1 Recovered from Human IgM+ Memory B Cells. *PLoS One* **3**,  
339 e3942 (2008).
- 340 4 Dreyfus, C. *et al.* Highly Conserved Protective Epitopes on Influenza B Viruses. *Science*  
341 **337**, 1343 (2012).
- 342 5 Ekiert, D. C. *et al.* Antibody recognition of a highly conserved influenza virus epitope.  
343 *Science* **324**, 246-251 (2009).
- 344 6 Wang, S. *et al.* Manipulating the selection forces during affinity maturation to generate  
345 cross-reactive HIV antibodies. *Cell* **160**, 785-797 (2015).
- 346 7 Krammer, F., Pica, N., Hai, R., Tan, G. S. & Palese, P. Hemagglutinin Stalk-Reactive  
347 Antibodies Are Boosted following Sequential Infection with Seasonal and Pandemic H1N1  
348 Influenza Virus in Mice. *J Virol* **86**, 10302 (2012).
- 349 8 Wang, T. T. *et al.* Broadly Protective Monoclonal Antibodies against H3 Influenza Viruses  
350 following Sequential Immunization with Different Hemagglutinins. *PLoS Path* **6**, e1000796  
351 (2010).
- 352 9 Wiley, D. C., Wilson, I. A. & Skehel, J. J. Structural identification of the antibody-binding  
353 sites of Hong Kong influenza haemagglutinin and their involvement in antigenic variation.  
354 *Nature* **289**, 373-378 (1981).
- 355 10 Smith, D. J. *et al.* Mapping the Antigenic and Genetic Evolution of Influenza Virus. *Science*  
356 **305**, 371 (2004).
- 357 11 Corti, D. *et al.* A neutralizing antibody selected from plasma cells that binds to group 1 and  
358 group 2 influenza A hemagglutinins. *Science* **333**, 850-856 (2011).
- 359 12 Victora, G. D. & Nussenzweig, M. C. Germinal centers. *Annu Rev Immunol* **30**, 429-457  
360 (2012).
- 361 13 Lingwood, D. *et al.* Structural and genetic basis for development of broadly neutralizing  
362 influenza antibodies. *Nature* **489**, 566-570 (2012).
- 363 14 Weinreich, D. M., Delaney, N. F., Depristo, M. A. & Hartl, D. L. Darwinian evolution can  
364 follow only very few mutational paths to fitter proteins. *Science* **312**, 111-114 (2006).
- 365 15 Starr, T. N., Picton, L. K. & Thornton, J. W. Alternative evolutionary histories in the  
366 sequence space of an ancient protein. *Nature* **549**, 409-413 (2017).
- 367 16 Ortlund, E. A., Bridgham, J. T., Redinbo, M. R. & Thornton, J. W. Crystal Structure of an  
368 Ancient Protein: Evolution by Conformational Epistasis. *Science* **317**, 1544 (2007).
- 369 17 Podgornaia, A. I. & Laub, M. T. Pervasive degeneracy and epistasis in a protein-protein  
370 interface. *Science* **347**, 673 (2015).
- 371 18 Gong, L. I., Suchard, M. A. & Bloom, J. D. Stability-mediated epistasis constrains the  
372 evolution of an influenza protein. *Elife* **2**, e00631 (2013).
- 373 19 Sailer, Z. R. & Harms, M. J. High-order epistasis shapes evolutionary trajectories. *PLoS*  
374 *Comput Biol* **13**, e1005541 (2017).
- 375 20 Miton, C. & Tokuriki, N. How mutational epistasis impairs predictability in protein evolution  
376 and design. *Protein Sci* **25** (2016).
- 377 21 Poelwijk, F. J., Socolich, M. & Ranganathan, R. Learning the pattern of epistasis linking  
378 genotype and phenotype in a protein. *Nat Comm* **10**, 4213 (2019).



- 379 22 Bank, C., Hietpas, R. T., Jensen, J. D. & Bolon, D. N. A. A Systematic Survey of an  
380 Intragenic Epistatic Landscape. *Mol Biol Evol* **32**, 229-238 (2015).
- 381 23 Adams, R. M., Kinney, J. B., Walczak, A. M. & Mora, T. Epistasis in a fitness landscape  
382 defined by antibody-antigen binding free energy. *Cell Syst* **8**, 86-93 (2019).
- 383 24 Pappas, L. *et al.* Rapid development of broadly influenza neutralizing antibodies through  
384 redundant mutations. *Nature* **516**, 418-422 (2014).
- 385 25 Braden, B. C., Goldman, E. R., Mariuzza, R. A. & Poljak, R. J. Anatomy of an antibody  
386 molecule: structure, kinetics, thermodynamics and mutational studies of the antilysozyme  
387 antibody D1.3. *Immunol Rev* **163**, 45-57 (1998).
- 388 26 Doud, M. B., Lee, J. M. & Bloom, J. D. How single mutations affect viral escape from broad  
389 and narrow antibodies to H1 influenza hemagglutinin. *Nat Comm* **9**, 1386 (2018).
- 390 27 Wu, N. C. *et al.* Different genetic barriers for resistance to HA stem antibodies in influenza  
391 H3 and H1 viruses. *Science* **368**, 1335 (2020).
- 392 28 Starr, T. N. *et al.* Prospective mapping of viral mutations that escape antibodies used to  
393 treat COVID-19. *Science* **371**, 850 (2021).
- 394 29 Unniraman, S. & Schatz, D. G. Strand-biased spreading of mutations during somatic  
395 hypermutation. *Science* **317**, 1227-1230 (2007).
- 396 30 Chen, G., Dubrawsky, I., Mendez, P., Georgiou, G. & Iverson, B. L. In vitro scanning  
397 saturation mutagenesis of all the specificity determining residues in an antibody binding  
398 site. *Protein Eng* **12**, 349-356 (1999).
- 399 31 Burks, E. A., Chen, G., Georgiou, G. & Iverson, B. L. In vitro scanning saturation  
400 mutagenesis of an antibody binding pocket. *Proc Natl Acad Sci U S A* **94**, 412 (1997).
- 401 32 Klein, F. *et al.* Somatic Mutations of the Immunoglobulin Framework Are Generally  
402 Required for Broad and Potent HIV-1 Neutralization. *Cell* **153**, 126-138 (2013).
- 403 33 Yewdell, J. W. To dream the impossible dream: universal influenza vaccination. *Curr Opin*  
404 *Viro* **3**, 316-321 (2013).
- 405 34 Henry, C., Palm, A.-K. E., Krammer, F. & Wilson, P. C. From Original Antigenic Sin to the  
406 Universal Influenza Virus Vaccine. *Trends Immunol* **39**, 70-79 (2018).
- 407 35 Adams, R. M., Mora, T., Walczak, A. M. & Kinney, J. B. Measuring the sequence-affinity  
408 landscape of antibodies with massively parallel titration curves. *Elife* **5** (2016).
- 409 36 Koenig, P. *et al.* Mutational landscape of antibody variable domains reveals a switch  
410 modulating the interdomain conformational dynamics and antigen binding. *Proc Natl Acad*  
411 *Sci U S A* **114**, e486-e495 (2017).
- 412 37 Forsyth, C. M. *et al.* Deep mutational scanning of an antibody against epidermal growth  
413 factor receptor using mammalian cell display and massively parallel pyrosequencing.  
414 *MAbs* **5**, 523-532 (2013).
- 415 38 Wu, N. C. *et al.* In vitro evolution of an influenza broadly neutralizing antibody is modulated  
416 by hemagglutinin receptor specificity. *Nat Comm* **8**, 15371 (2017).
- 417 39 Xu, H. *et al.* Key mutations stabilize antigen-binding conformation during affinity  
418 maturation of a broadly neutralizing influenza antibody lineage. *Proteins* **83**, 771-780  
419 (2015).
- 420 40 Madan, B. *et al.* Mutational fitness landscapes reveal genetic and structural improvement  
421 pathways for a vaccine-elicited HIV-1 broadly neutralizing antibody. *Proc Natl Acad Sci U*  
422 *S A* **118**, e2011653118 (2021).
- 423 41 Boder, E. T. & Wittrup, K. D. Yeast surface display for screening combinatorial polypeptide  
424 libraries. *Nat Biotech* **15**, 553-557 (1997).
- 425 42 Batista, F. D. & Neuberger, M. S. Affinity dependence of the B cell response to antigen: a  
426 threshold, a ceiling, and the importance of off-rate. *Immunity* **8**, 751-759 (1998).
- 427 43 Wells, J. A. Additivity of mutational effects in proteins. *Biochemistry* **29**, 8509-8517 (1990).
- 428 44 Olson, C. A., Wu, N. C. & Sun, R. A comprehensive biophysical description of pairwise  
429 epistasis throughout an entire protein domain. *Curr Biol* **24**, 2643-2651 (2014).

- 430 45 Esmailbeiki, R., Krawczyk, K., Knapp, B., Nebel, J.-C. & Deane, C. M. Progress and  
431 challenges in predicting protein interfaces. *Brief Bioinform* **17**, 117-131 (2016).
- 432 46 Rotem, A. *et al.* Evolution on the Biophysical Fitness Landscape of an RNA Virus. *Mol Biol*  
433 *Evol* **35**, 2390-2400 (2018).
- 434 47 Wang, S. Optimal Sequential Immunization Can Focus Antibody Responses against  
435 Diversity Loss and Distraction. *PLoS Comput Biol* **13**, e1005336 (2017).
- 436 48 Sachdeva, V., Husain, K., Sheng, J., Wang, S. & Murugan, A. Tuning environmental  
437 timescales to evolve and maintain generalists. *Proc Natl Acad Sci U S A* **117**, 12693-  
438 12699 (2020).
- 439 49 Molari, M., Eyer, K., Baudry, J., Cocco, S. & Monasson, R. Quantitative modeling of the  
440 effect of antigen dosage on B-cell affinity distributions in maturing germinal centers. *Elife*  
441 **9** (2020).
- 442 50 Sprenger, K. G., Louveau, J. E., Murugan, P. M. & Chakraborty, A. K. Optimizing  
443 immunization protocols to elicit broadly neutralizing antibodies. *Proc Natl Acad Sci U S A*  
444 **117**, 20077 (2020).
- 445

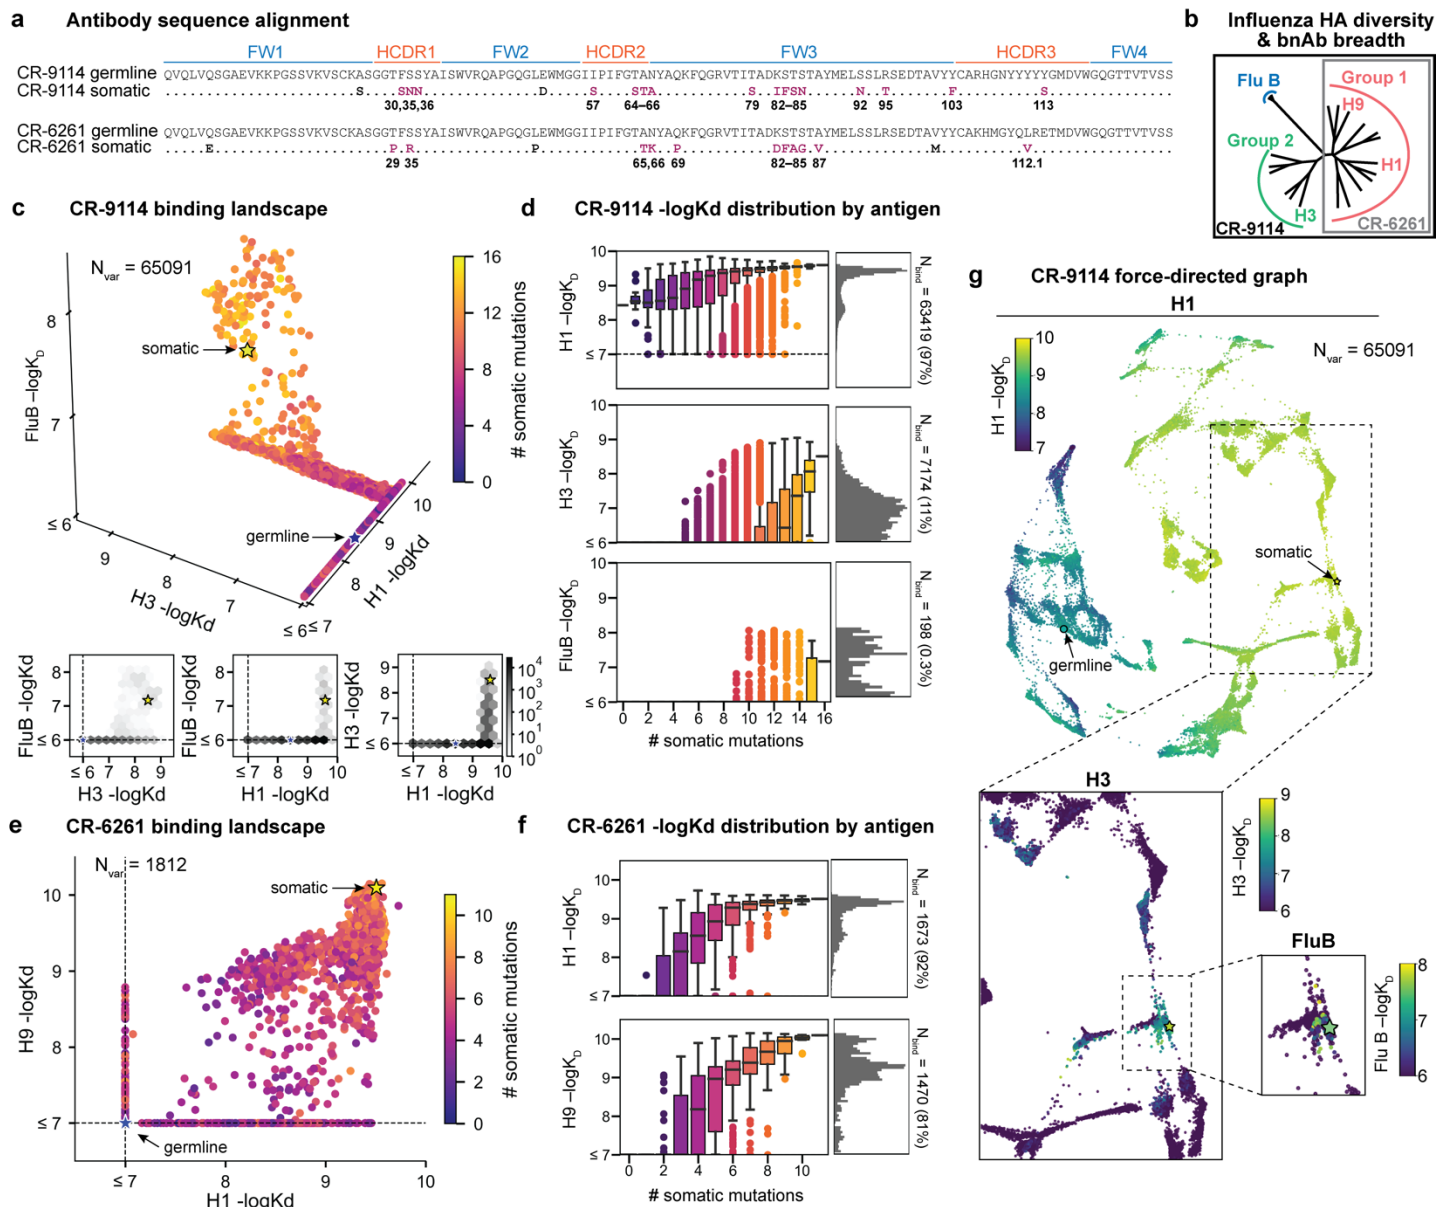

**Figure 1: Binding landscapes.** **a**, Sequence alignment comparing somatic heavy chains to reconstructed germline sequences. Mutations under study (purple, numbered) and excluded mutations (black) are indicated. **b**, Influenza hemagglutinin phylogenetic tree with selected antigens and breadth of CR-9114 (black box) and CR-6261 (gray box) indicated. **c**, **e**, Scatterplots of the **(c)** CR-9114 library binding affinities against three antigens, with 2D planes shown below, and **(e)** CR-6261 library binding affinities against two antigens. **d**, **f**, Distributions of library binding affinities for **(d)** CR-9114 and **(f)** CR-6261 for each antigen (grey histogram, right) separated by number of somatic mutations (boxplots, left). Numbers and percentages of variants with measurable binding are indicated at right. **g**, Force-directed graph of CR-9114 H1  $-\log K_D$ . Each variant (node) is connected to its 16 single-mutation neighbors (edges not shown for clarity); edges are weighted such that variants with similar genotypes and  $-\log K_D$  tend to cluster. Nodes are colored by binding affinity to H1 (top), H3 (middle inset), and Flu B (bottom inset). See ED Fig. 4 for an equivalent graph for CR-6261 binding to H1 and H9.

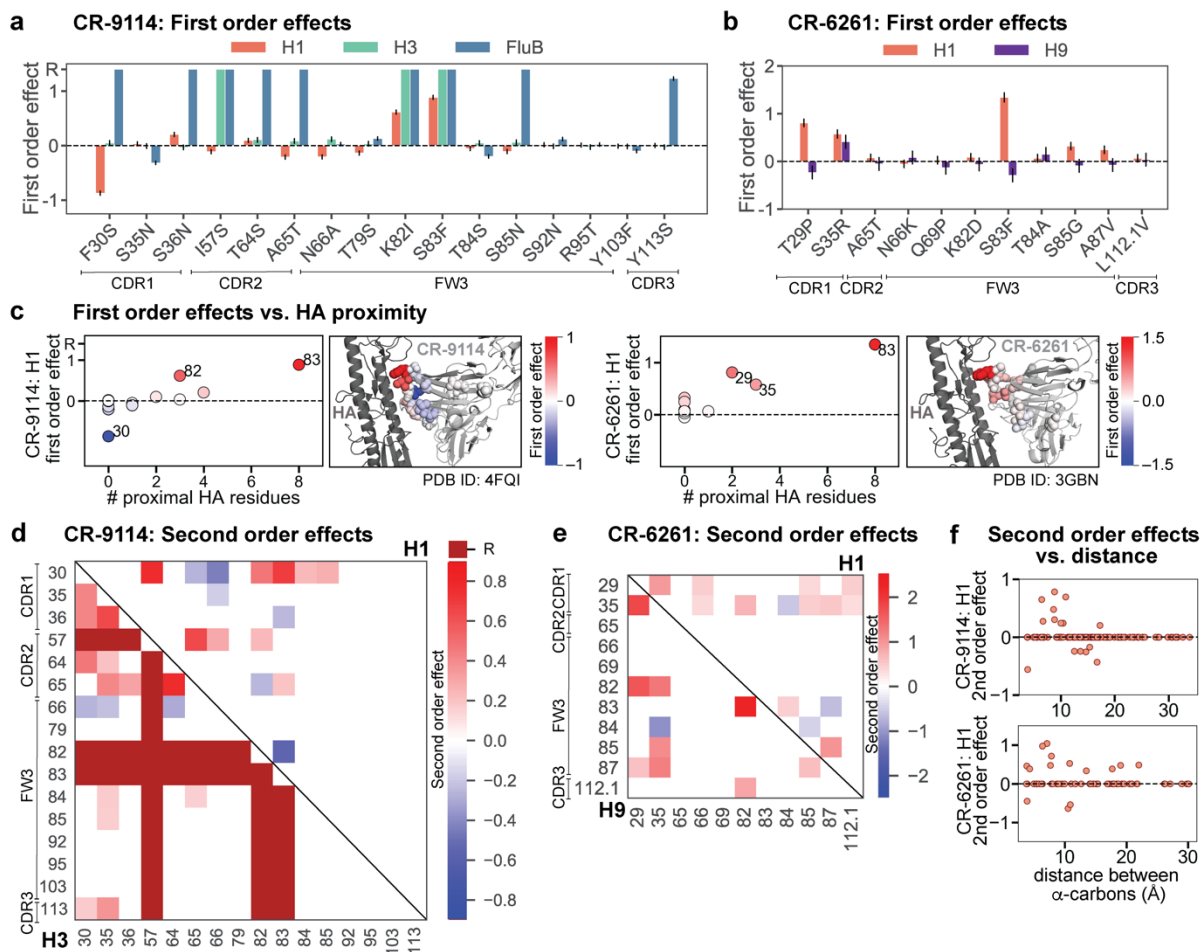

**Figure 2:** Linear effects and pairwise epistasis. **a, b** First order effects inferred in best-fitting epistatic interaction models for **(a)** CR-9114 and **(b)** CR-6261. Mutations required for binding (present at over 90% frequency in binding sequences) have effect sizes denoted as “R” and are removed from inference. Error bars indicate standard error. **c**, First order effects for each site plotted against the number of HA residues within 6 Å (left, CR-9114; right, CR-6261). Top three sites are labeled. Cocystal structures are also shown; mutations are colored by first-order effect size. See ED Fig. 5a for equivalent plot for CR-9114 with H3 and CR-6261 with H9. **d**, Significant second-order epistatic interaction coefficients for CR-9114 mutations (bottom left, H3; top right, H1). Interactions involving required mutations are shown in dark red. **e**, Significant second order coefficients for CR-6261 mutations (bottom left, H9; top right, H1). **f**, Second-order coefficients for H1  $-\log K_D$  plotted against the distance between the respective  $\alpha$ -carbons in the crystal structures. See ED Fig. 5b for equivalent plot for CR-9114 with H3 and CR-6261 with H9. Significance in **d, e** indicates Bonferroni-corrected  $p$ -value < 0.05, see SI.

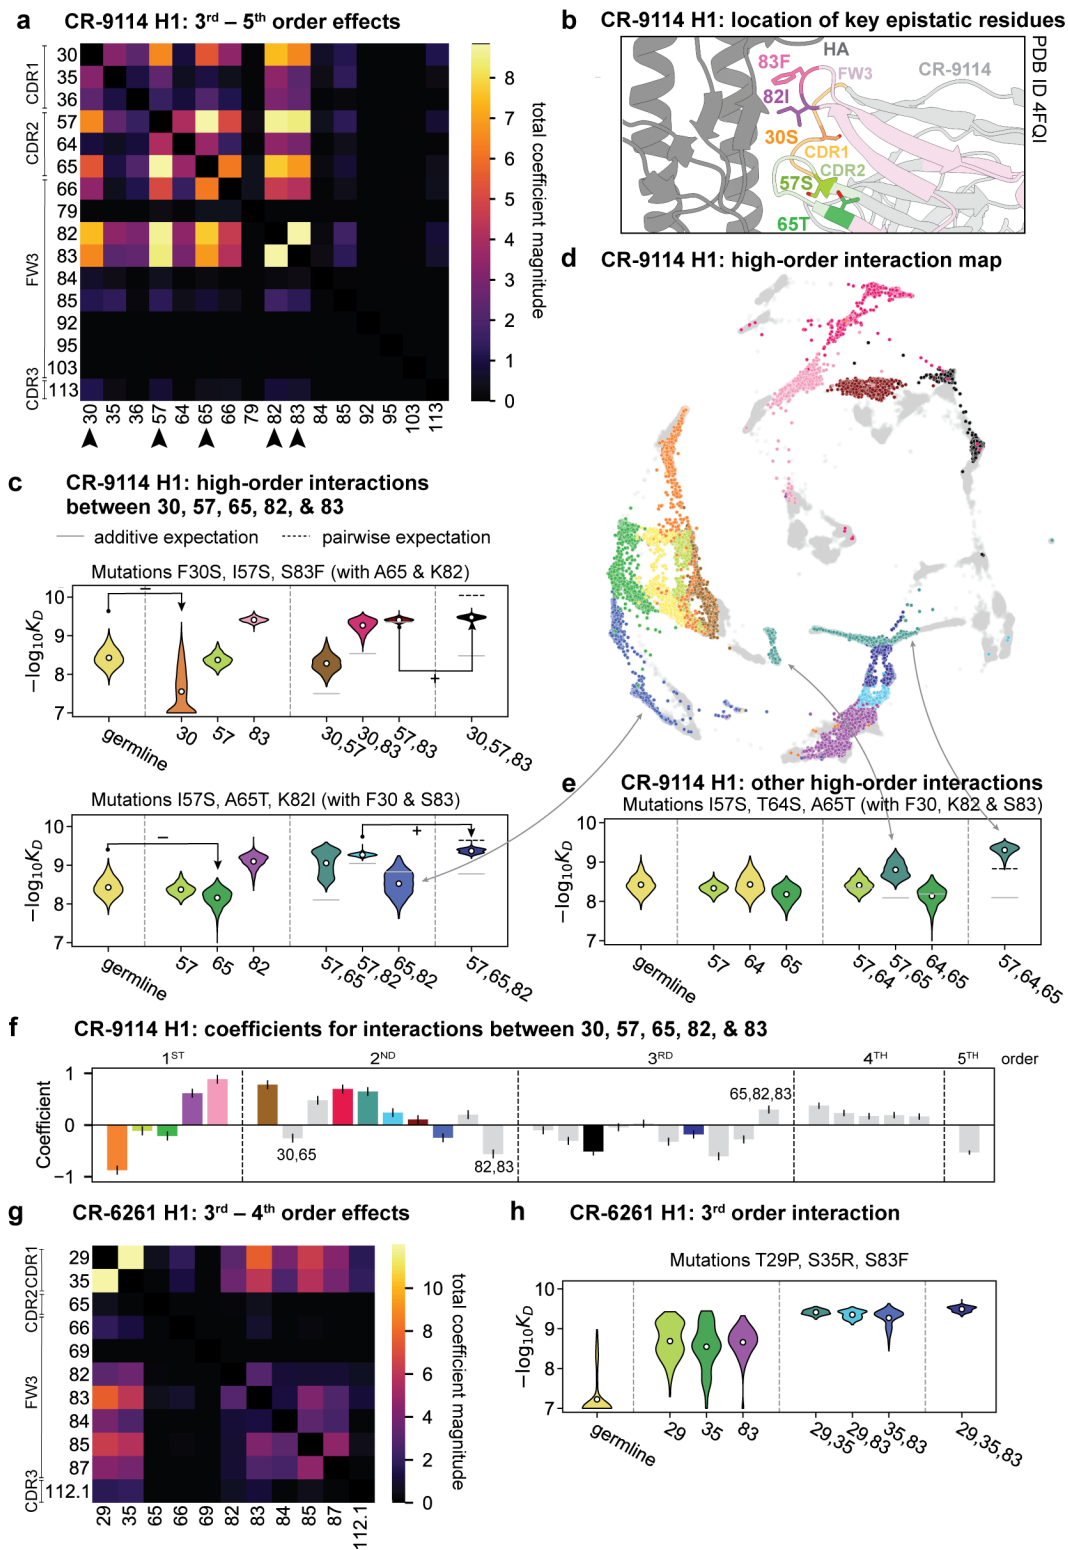

**Figure 3: High-order epistasis.** **a**, Total higher-order epistatic contributions of CR-9114 mutation pairs for binding H1. Color bar indicates the sum of absolute values of significant higher-order interaction coefficients involving each pair of mutations; key epistatic residues indicated by arrows. See ED Fig. 6f for equivalent figure with H3. **b**, Location of key epistatic residues in the CR-9114–HA co-crystal structure colored by region. **c**,  $-\log_{10}K_D$  distributions for genotypes grouped by their identity at the five residues indicated in **a**, **b**, with means indicated as white dots ( $N=8,192$  genotypes per violin). Annotations indicate notable deleterious ('-') and beneficial ('+') mutational effects. **d**, CR-9114 force-directed graph from Fig. 1g, colored as in **c** by the genotype at the five sites indicated in **a**, **b**. Genotypes not shown in **c** are shown in light grey. See ED Fig. 6a for graph colored by all 32 5-site genotypes. **e**, Third-order interaction involving site 64 accounts for distinct clusters (teal) corresponding to genotypes with mutations 57 and 65 in **d**. Colors correspond to mutation groups in **c**, **d** ( $N=4,096$  genotypes per violin).

**Figure 3, continued: f**, Epistatic interaction coefficients among the five key sites from **a**, **b**. Colors for certain groups as in **c**, **d**; other groups denoted in gray, with notable terms labeled. **g**, Total significant epistatic contributions of CR-6261 mutation pairs for binding H1, as in **a**. **h**, Third-order interaction for CR-6261 H1 binding between mutations T29P, S35R, and S83F (N=256 genotypes per violin). Significance in **a**, **g** indicates Bonferroni-corrected  $p$ -value < 0.05, see SI.

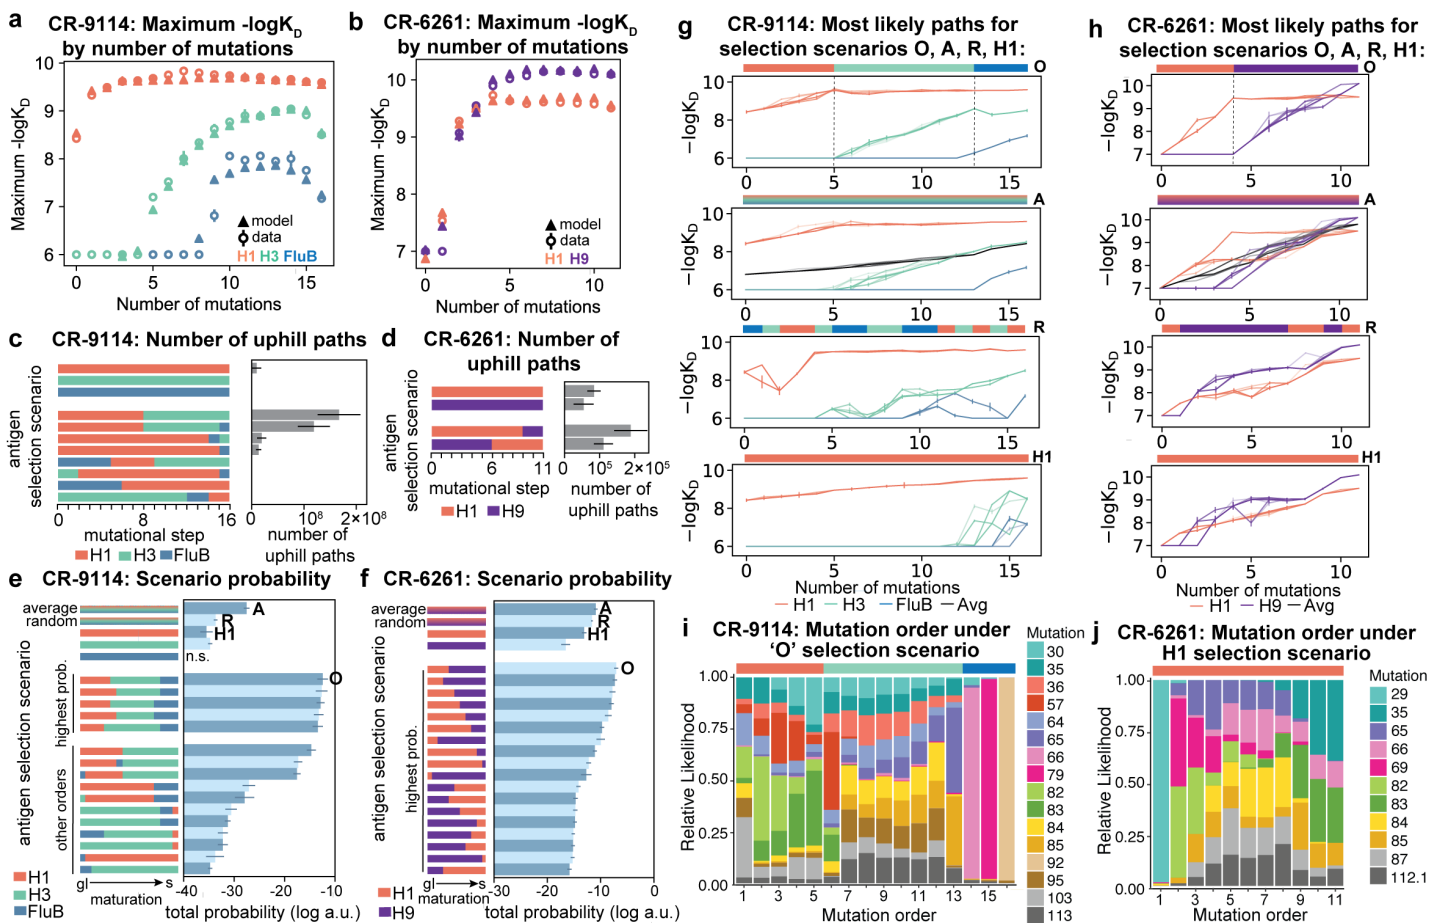

**Figure 4:** Antigen selection scenarios and likely mutational pathways. **a, b**, Maximum binding affinity achievable for sequences with a given number of mutations. For each antigen for **(a)** CR-9114 and **(b)** CR-6261, the maximum observed (circles) and model-predicted (triangles) affinity for each number of somatic mutations is shown. **c, d**, Total number of ‘uphill’ paths for select antigen selection scenarios (colored bars) for **(c)** CR-9114 and **(d)** CR-6261. Error bars indicate standard error obtained through bootstrap. **e, f**, Total log probability (in arbitrary units) of mutational trajectories from germline to somatic sequence under different antigen selection scenarios, in a moderate selection model (see ED Fig 8a,b for other models). Error bars indicate standard error obtained through bootstrap. **g, h**, 25 most likely paths for **(g)** CR-9114 and **(h)** CR-6261, from select scenarios in **e, f**;  $-\log K_D$  plotted for each antigen. For the random mixed scenario (‘R’), a representative case is shown. **i, j**, Probability of mutation order under antigen selection scenario ‘O’ for CR-9114 **(i)** and ‘H1’ for CR-6261 **(j)**. Selection scenarios are as in **e, f** and shown in colored bar at top; the total probability (through all possible paths) for each mutation to occur at each mutational step is shown as stacked colored bars. See ED Fig. 8 for additional selection scenarios.

**a** CR-9114 binds HA2 stem epitope

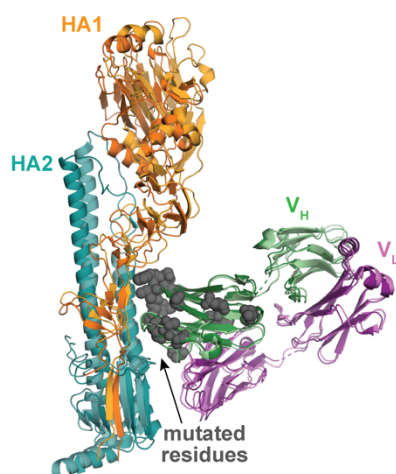

**b** CR-6261 binds HA2 stem epitope

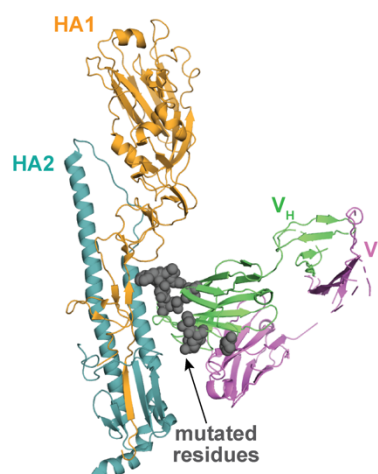

**ED Figure 1: Co-crystal structures.** **a**, Alignment of co-crystal structure of CR-9114 with H5 (light hues; PDB ID 4FQI<sup>4</sup>) and CR-9114 with H3 (dark hues; PDB ID 4FQY<sup>4</sup>). Mutated residues shown as gray spheres. **b**, Co-crystal structure of CR-6261 with H1 (PDB ID 3GBN<sup>5</sup>); mutated residues shown as gray spheres.



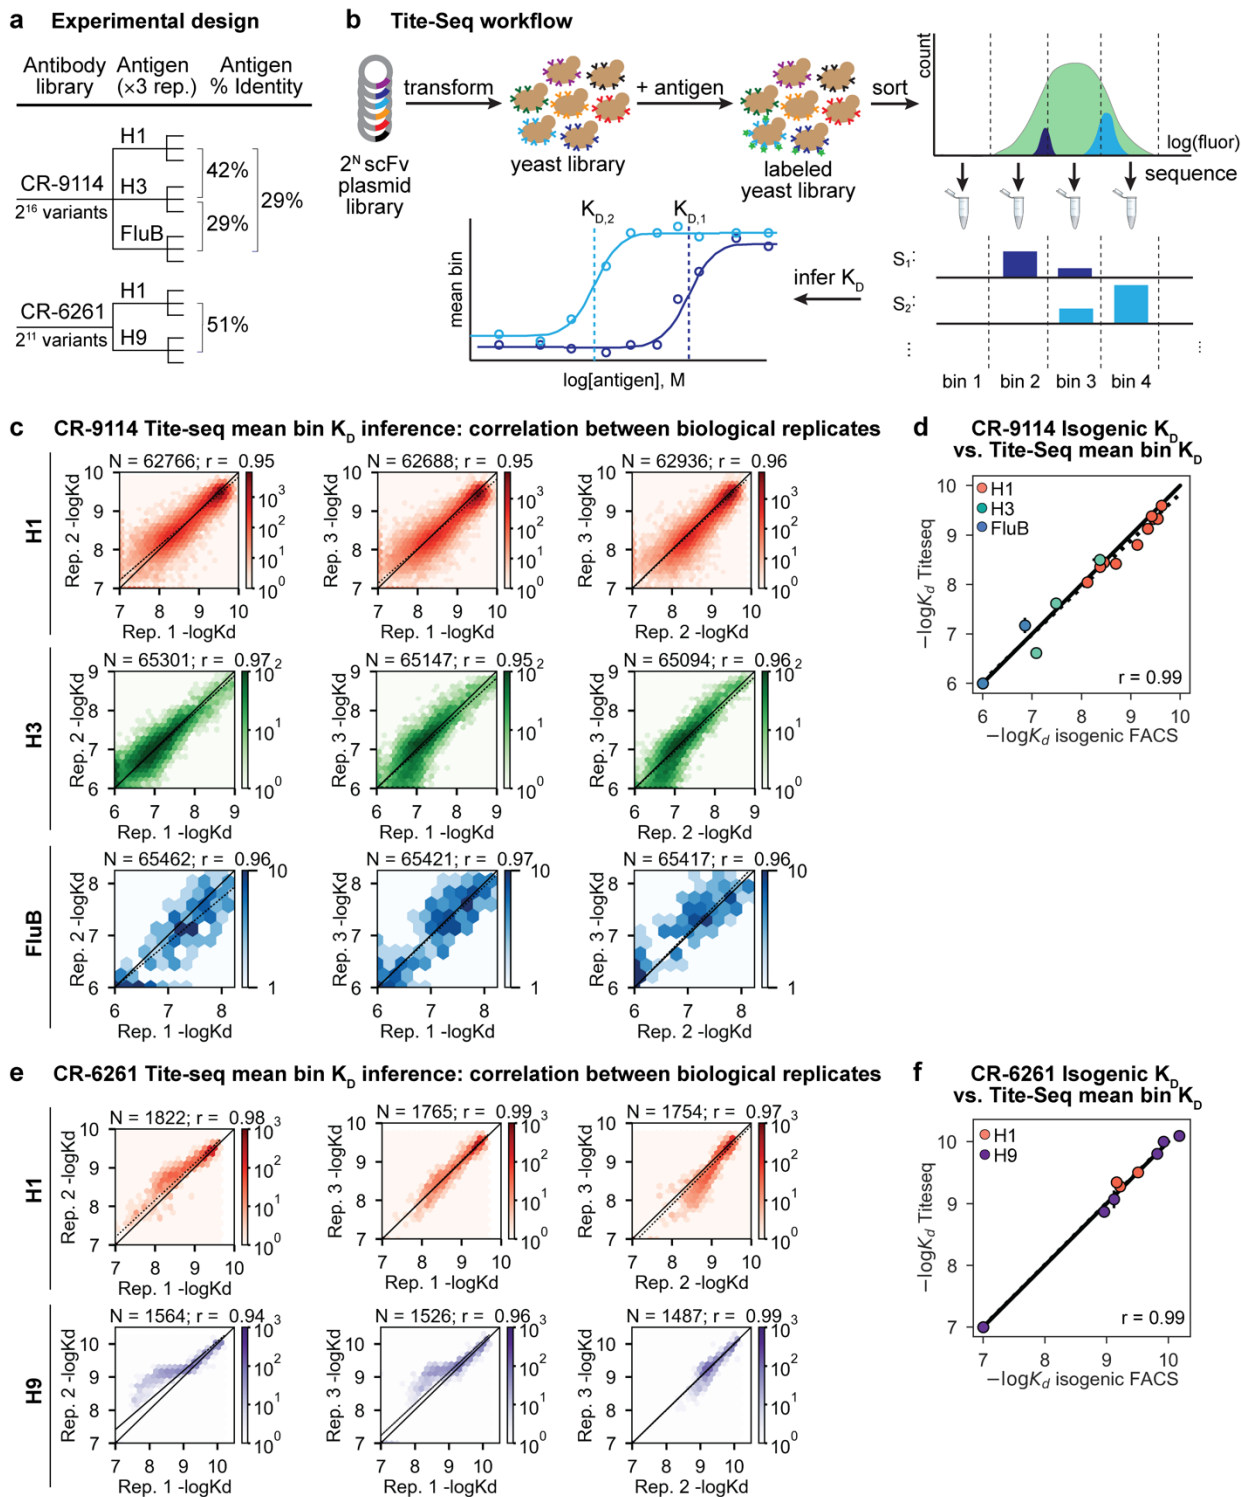

**ED Figure 2: Data quality. a**, Experimental design. **b**, Tite-Seq assay. Surface display single-chain variable fragment (scFv) libraries are transformed into yeast and labeled with fluorescent antigen, followed by FACS into bins and sequencing. Dissociation constants are inferred from changes in mean bin fluorescence across 12 antigen concentrations, see SI. **c**, **e**, Correlation of (c) CR-9114 and (e) CR-6261  $K_D$  measurements between biological replicates. **d**, **f**, Validation of (d) CR-9114 and (f) CR-6261 Tite-Seq  $K_D$  measurements by isogenic flow cytometry measurements for a subset of variants and antigens.

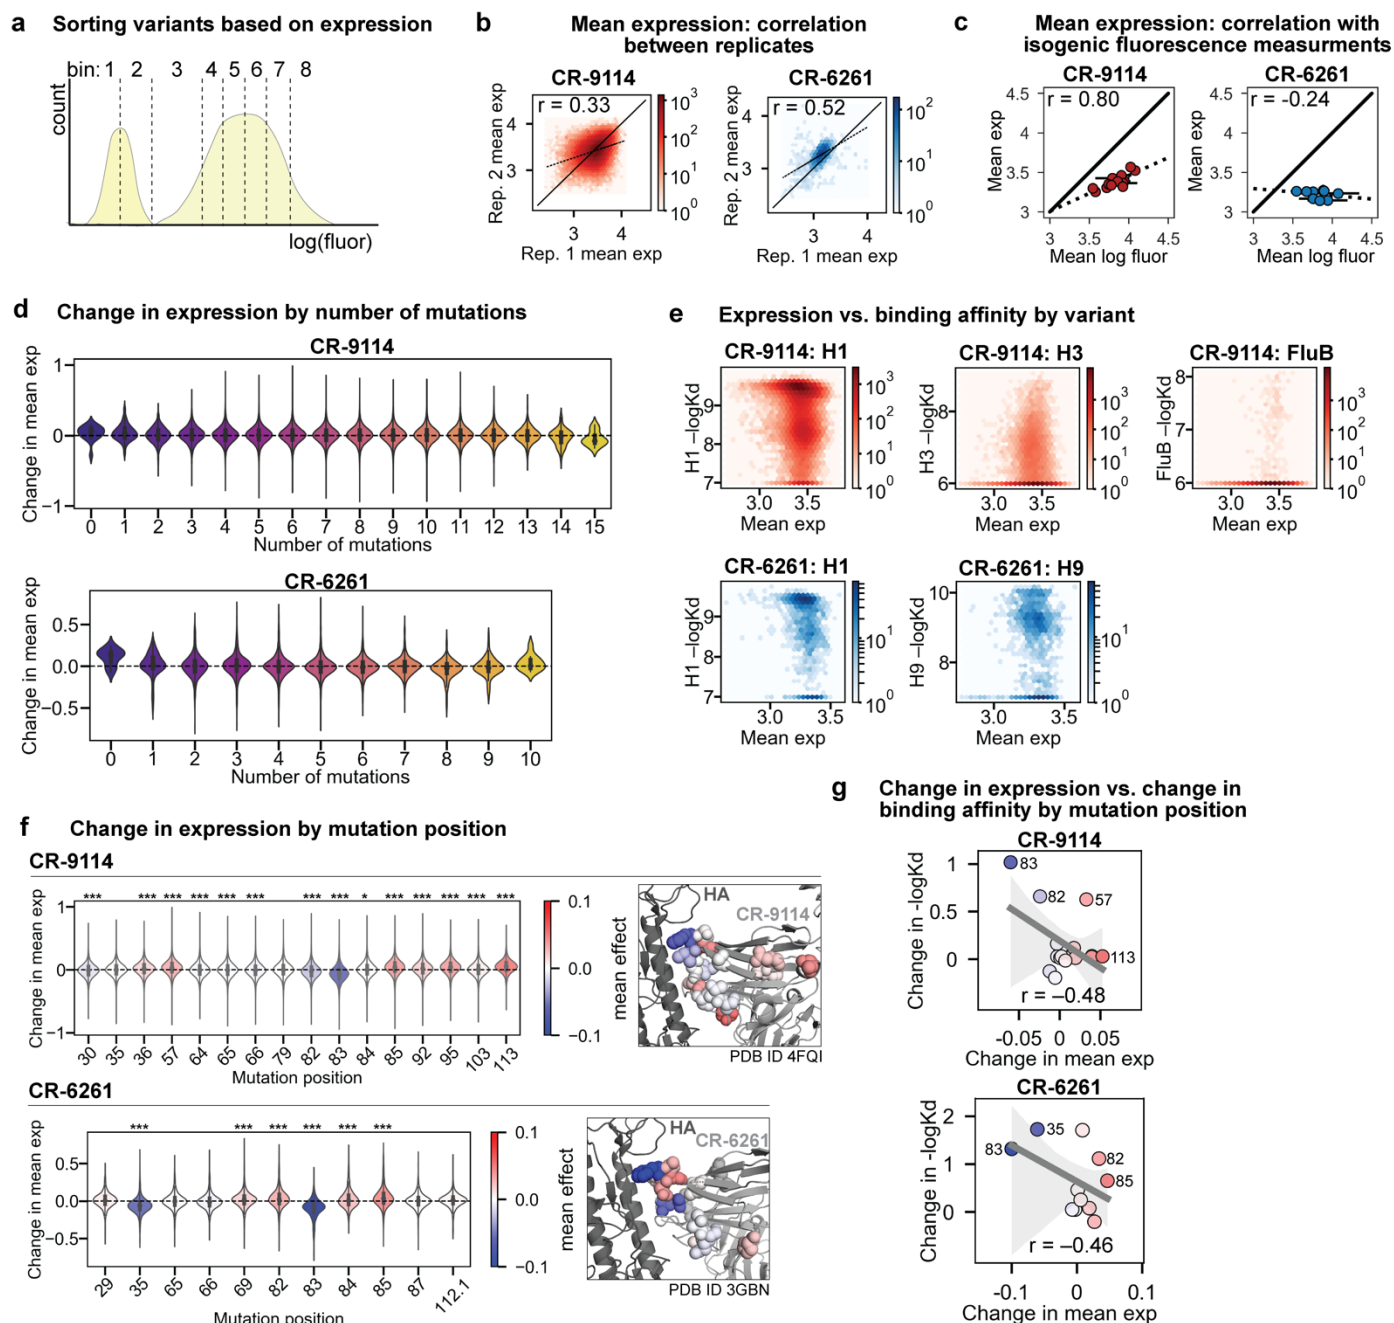

**ED Figure 3: Expression of antibody libraries.** **a**, Expression gates were drawn such that each of 8 bins included 12.5% of the antibody library. Expression is calculated as mean log fluorescence of each sequence across bins (see SI). **b**, Correlation of expression across biological replicates for CR-9114 library (left, red) and CR-6261 library (right, blue). **c**, Correlation between Tite-Seq mean expression and isogenic expression fluorescence for select CR-9114 (left, red) and CR-6261 (right, blue) variants. **d**, Change in expression upon mutation for a given number of background somatic mutations. **e**, Correlation between mean expression and  $-\log K_D$ . Average values across biological replicates ( $N_{-\log K_D} = 3$ ;  $N_{\text{exp}} \geq 6$ ) are plotted. **f**, Change in expression upon mutation at a specific site. Violin plots (left) and residues in co-crystal structure (right) are colored by mean change in expression for each site. Asterisks above violins indicate  $p$ -values for two-sided  $t$ -test between the distribution means and zero ( $p < 0.01$  (\*),  $< 0.001$  (\*\*),  $< 0.0001$  (\*\*\*)). **g**, Correlation between mean change in expression and mean change in  $-\log K_D$  (summed across all antigens) by mutation position. Select mutations with large impacts on expression and  $-\log K_D$  are labeled; all points are colored by mean change in expression, as in **f**. Dark gray line indicates best-fit linear regression (95% confidence intervals in light gray).

**a** CR-6261 force-directed graph: H1  $-\log K_D$

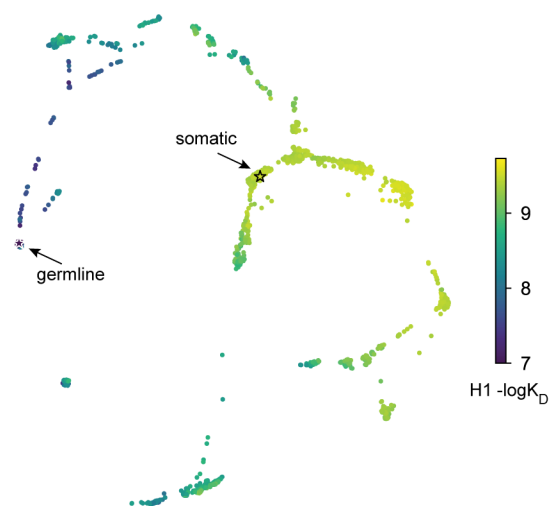

**b** CR-6261 force-directed graph: H9  $-\log K_D$

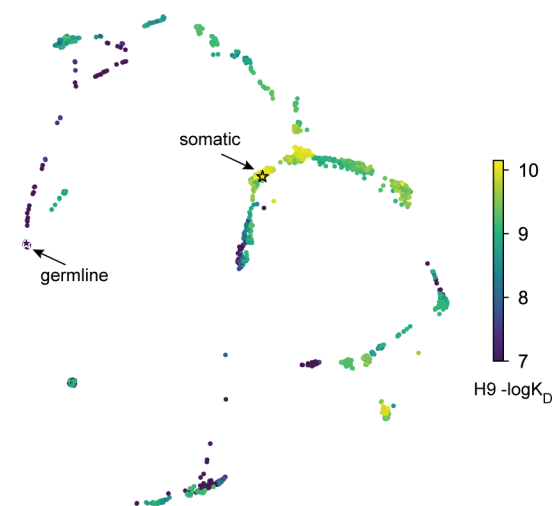

**ED Figure 4:** Force-directed graphs. **a**, **b**, Force-directed graph for CR-6261 H1  $-\log K_D$ , as in Fig. 1g. Nodes are colored by binding affinity to **(a)** H1 and **(b)** H9.

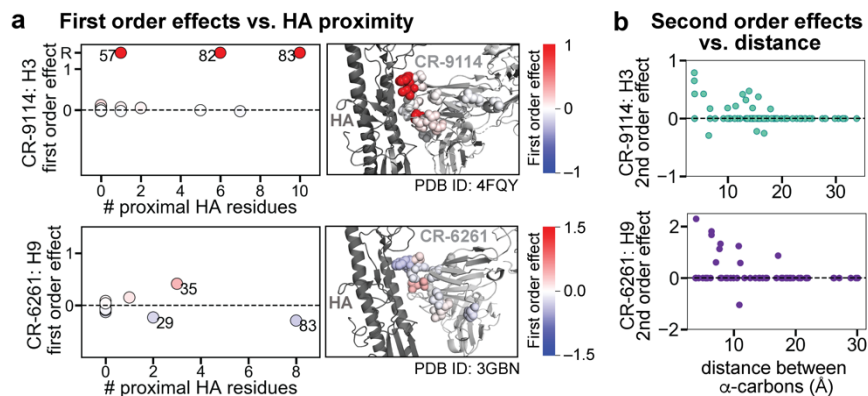

**ED Figure 5:** Structural context of first and second order effects. **a**, Left: first order effects for each site, colored by effect size and plotted against the number of antigen residues within 6 Å (top, CR-9114 with H3; bottom, CR-6261 with H9); Right: cocrystal structures with mutation sites colored by first order effects, as in Fig. 2c. **b**, Second-order coefficients for CR-9114 (top) and CR-6261 (bottom) plotted against the distance between the respective  $\alpha$ -carbons in the crystal structures, as in Fig. 2f.

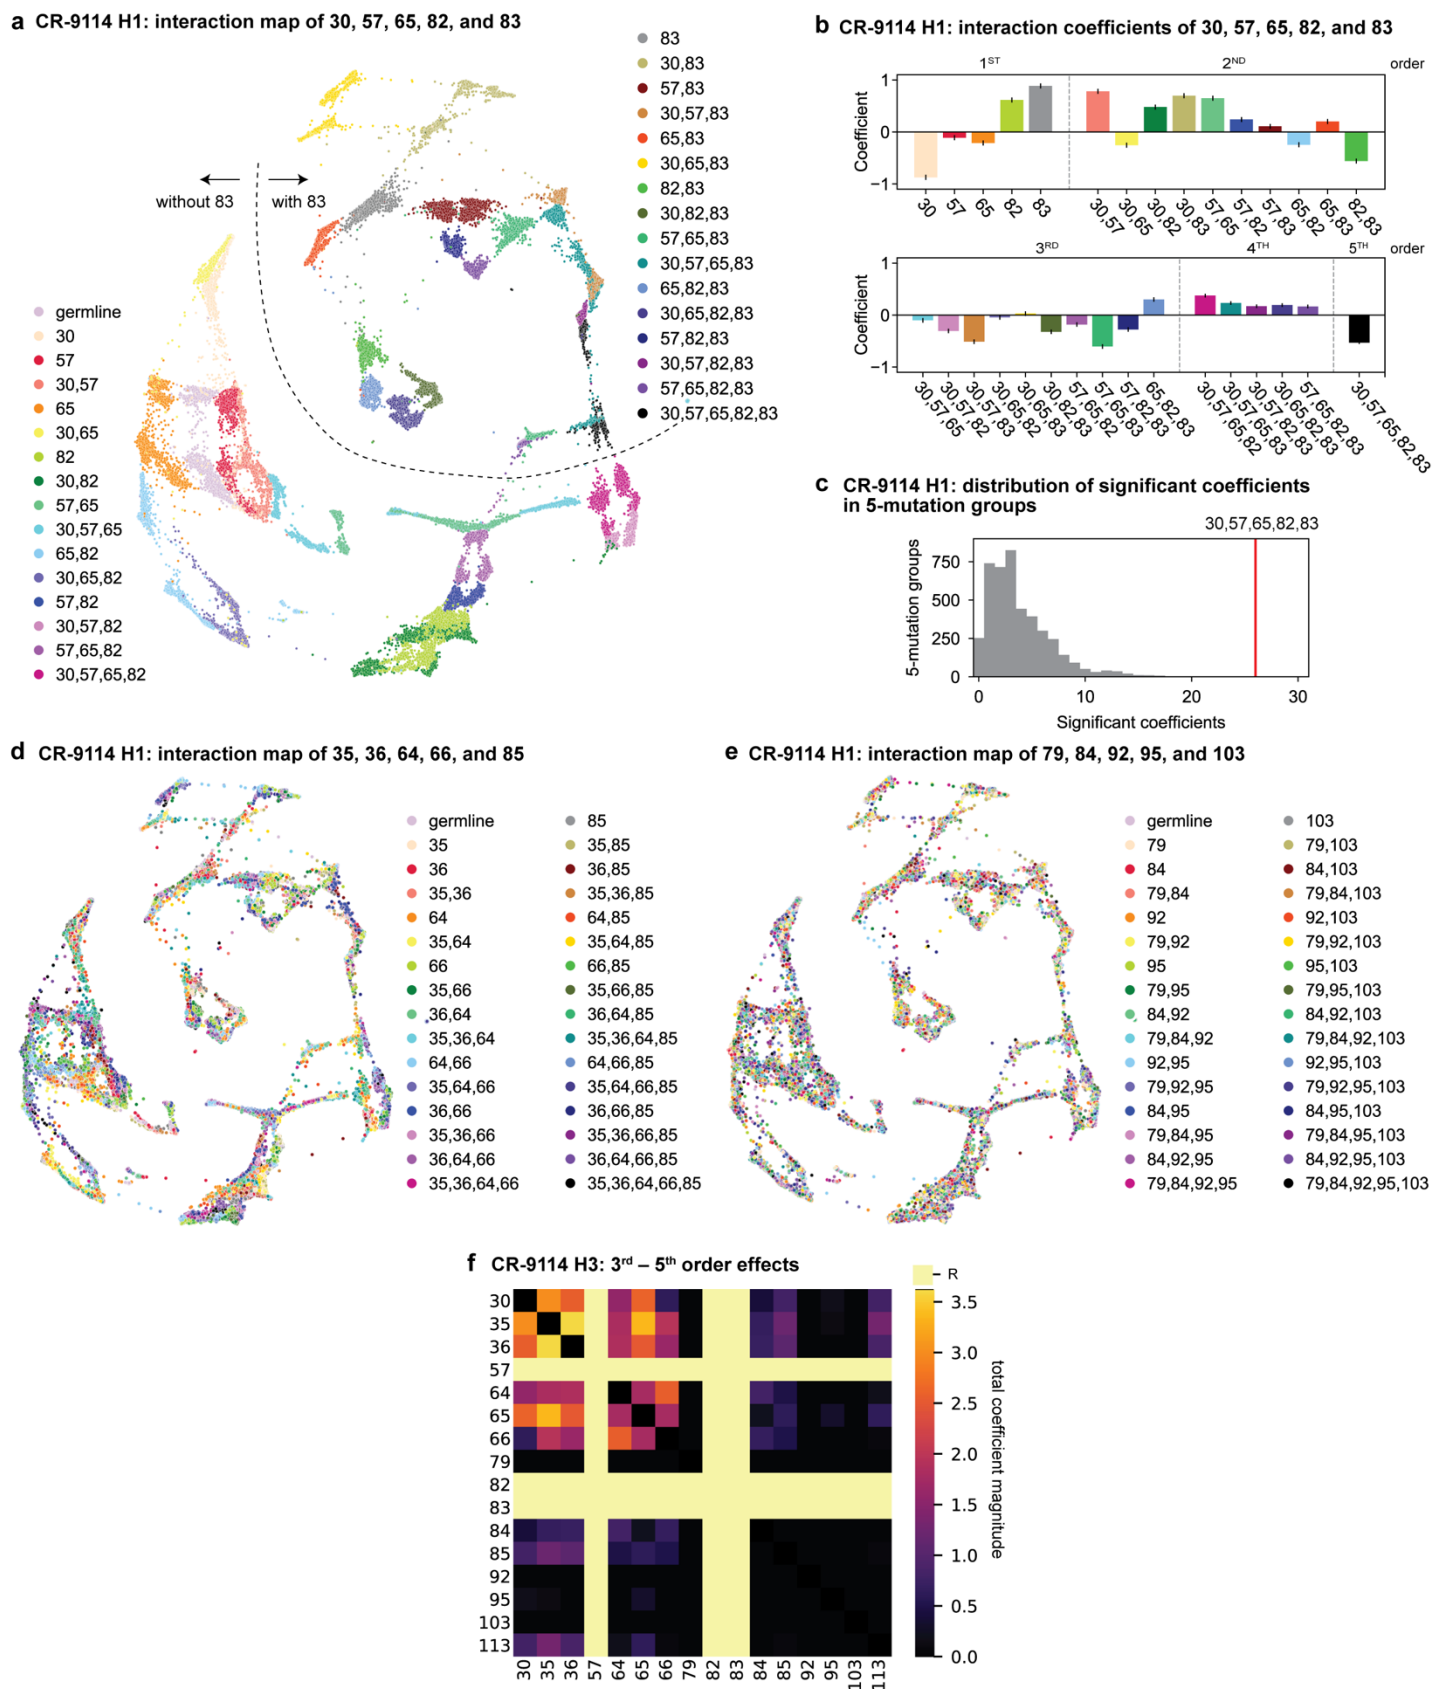

**ED Figure 6:** High-order interactions for CR-9114. **a**, CR-9114 force-directed graph, as in Fig. 3d, colored by mutation groups of sites 30, 57, 65, 82, and 83 (32 total groups). The dashed line emphasizes the observed separation of genotypes with S83 (upper left) from those with S83F (lower right). **b**, Coefficients for terms in the epistatic interaction model corresponding to mutation groups of sites 30, 57, 65, 82, and 83 (31 total groups, excluding the germline), colored according to **a** and grouped by order. Error bars indicate standard error.

**ED Figure 6, continued:** **c**, Distribution of the number of significant coefficients for mutation groups in every possible set of 5 sites chosen from the 16 sites (up to 31 terms for each group, for 4,368 groups). The group illustrated in **a**, **b** is shown in red (26 significant terms, empirical  $p$ -value  $< 10^{-3}$ ). **d**, CR-9114 force-directed graph, colored by mutation groups of a different set of 5 sites with fewer strong epistatic interactions (35, 36, 64, 66, and 85). **e**, CR-9114 force-directed graph, colored by mutation groups of a different set of 5 sites with no strong linear contributions or epistatic interactions (79, 84, 92, 95, and 103). **f**, Higher-order significant epistatic contributions of CR-9114 mutation pairs, as in Fig. 3b, for binding H3. Light yellow columns indicate required mutations (sites 57, 82, and 83). Significance in **c**, **f** indicates Bonferroni-corrected  $p$ -value  $< 0.05$ , see SI.

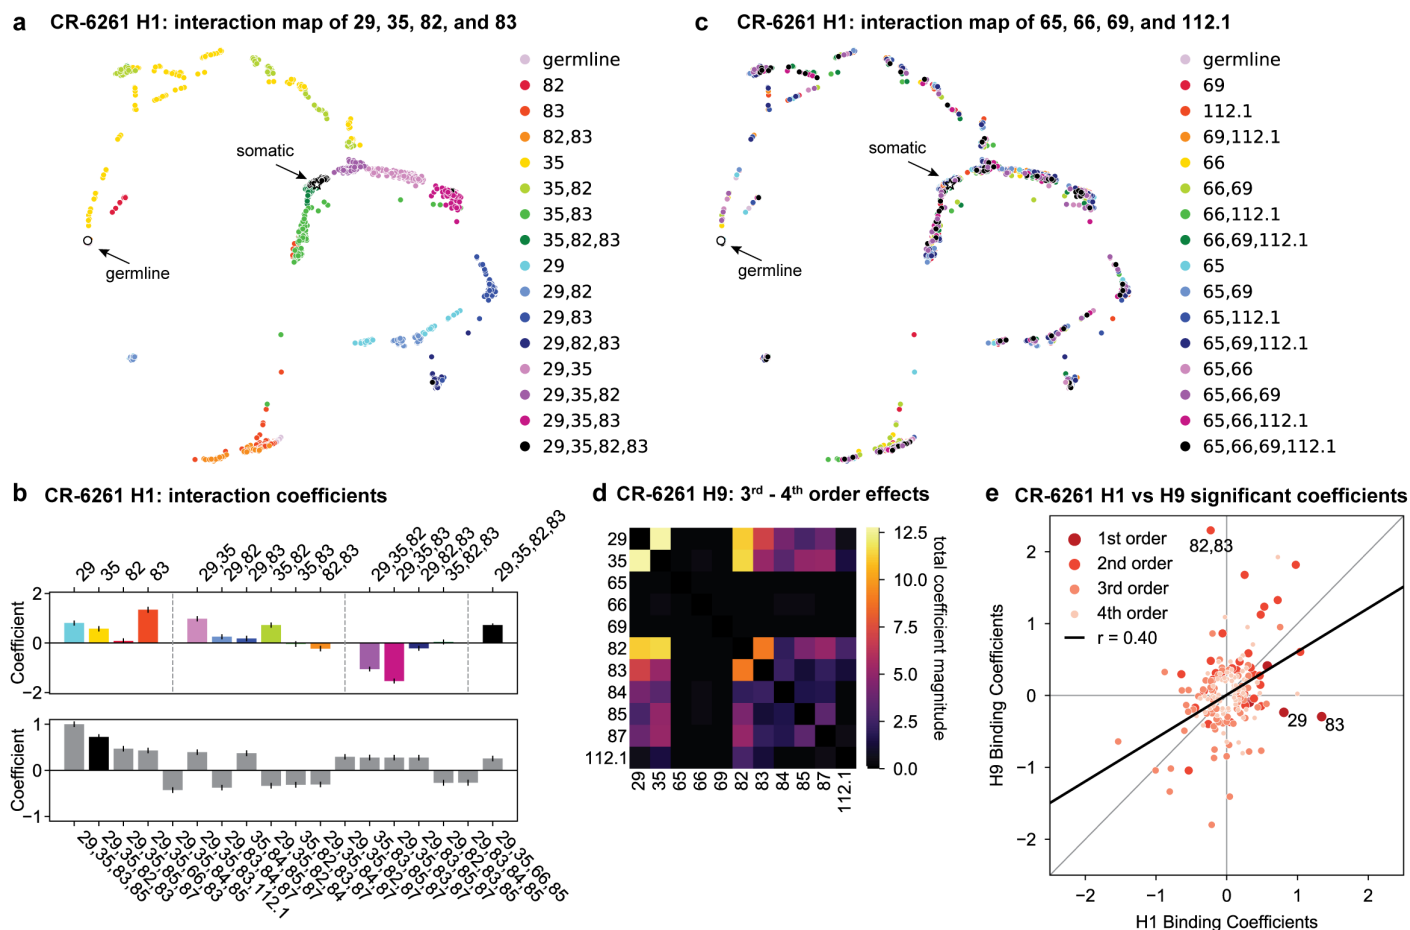

**ED Figure 7:** High-order interactions for CR-6261. **a**, CR-6261 force-directed graph, as in ED Fig. 4, colored by mutation groups of sites 29, 35, 82, and 83 (16 total groups). **b**, Top, coefficients for terms in the epistatic interaction model corresponding to the mutation groups illustrated in **a** (15 total groups, excluding the germline), colored according to **a** and grouped by order. Bottom, the largest fourth-order coefficients observed in the epistatic interaction model, with sites indicated. In both, error bars indicate standard error. **c**, CR-6261 force-directed graph, colored by a different set of 4 sites with the fewest strong linear effects and epistatic interactions (65, 66, 69, and 112.1). **d**, Higher-order significant epistatic contributions of CR-6261 mutation pairs, as in Fig. 3g, for binding H9. **e**, Scatterplot of significant epistatic interaction model coefficients for binding to H1 and H9. Terms at different orders are colored and sized as indicated. Selected coefficients are annotated. Significance in **d**, **e** indicates Bonferroni-corrected  $p$ -value  $< 0.05$ , see SI.

**a Selection models**

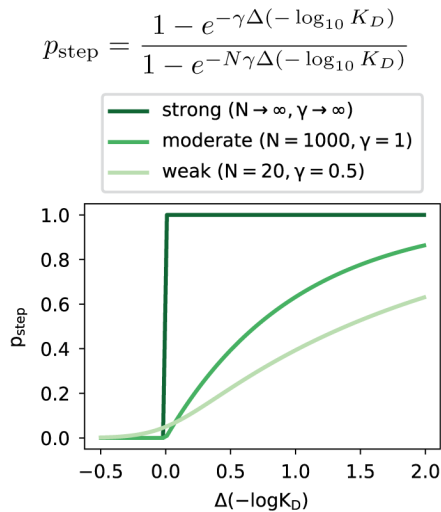

**d CR-9114: Variant log likelihood under 'O' moderate selection scenario**

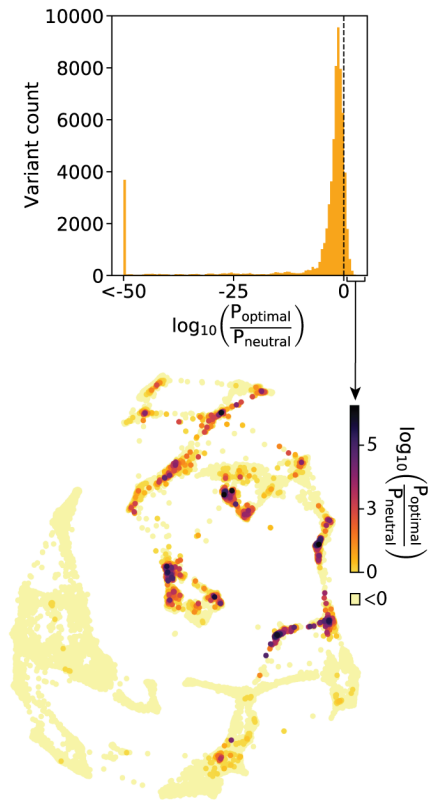

**b CR-9114 alternative selection models**

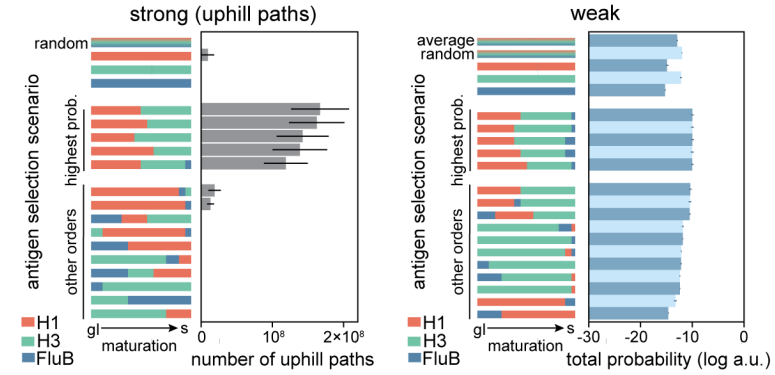

**c CR-6261 alternative selection models**

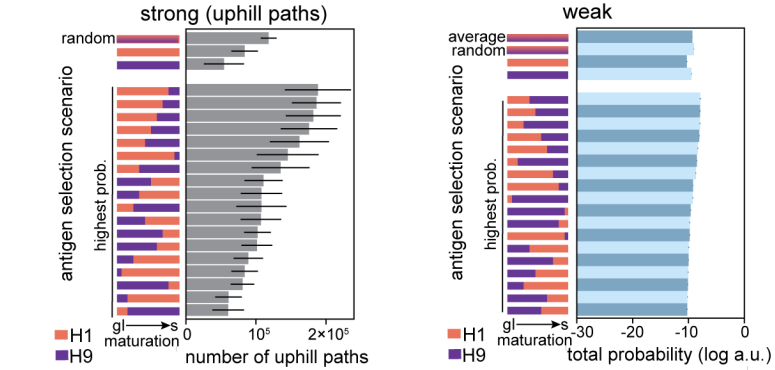

**e CR-9114: Mutation order under H1 moderate selection scenario**

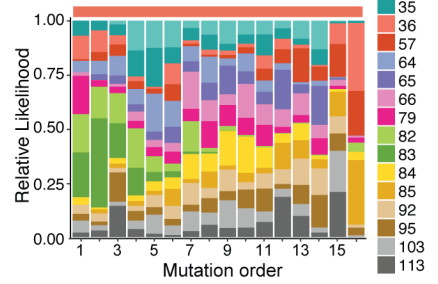

**g CR-6261: Mutation order under 'O' moderate selection scenario**

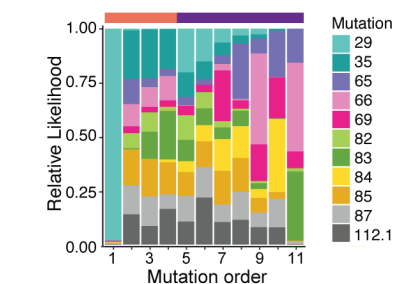

**f CR-9114: Mutation order under 'R' moderate selection scenario**

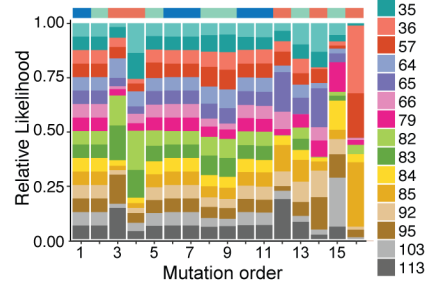

**h CR-6261: Mutation order under 'R' moderate selection scenario**

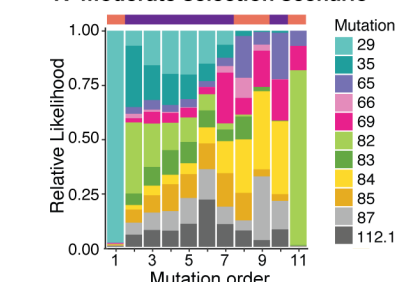

**ED Figure 8:** Likelihood of antigen selection scenarios and corresponding mutational pathways. **a**, Functional form of mutation step probability, illustrated for parameters chosen to represent strong, moderate, and weak selection models. **b, c**, Total log probability of the mutational trajectories between germline and somatic sequences for **(b)** CR-9114 and **(c)** CR-6261 under different antigen selection scenarios, assuming strong (left) or weak (right) selection, as shown for moderate selection in Fig. 4e,f. Strong selection scenarios are shown on a linear scale, as total probability is equal to the number of uphill paths. The “average” mixed scenario is not evaluated for strong selection, as the quantitative effect of averaging is undone by the binarizing effect of the transition probability.



**ED Figure 8, continued: d**, Total log probability of each variant in the optimal sequential selection scenario. Top, histogram of the total probability of all pathways passing through each variant in the optimal selection scenario, divided by the total probability in a model with no selection, transformed to  $\log_{10}$  scale. Dotted line indicates the 11% of variants favored in the selective model (log probability ratio greater than zero). Bottom, these favored variants are shown on the force-directed graph for CR-9114 H1  $-\log K_d$ , as in Fig. 1g, with darker color according to the log probability ratio. Other variants with log probability ratio less than zero are shown in light yellow. **e–h**, Probability of mutation order assuming moderate selection, under antigen selection scenarios ‘H1’ (**e**) and ‘R’ (**f**) for CR-9114 and ‘O’ (**g**) and ‘R’ (**h**) for CR-6261, as in Fig. 4i,j.
